# Supplementary material for: Eco-Engineered Al₂O₃–Chitosan Matrix for Sustainable Water Decontamination from Humic Acid
Source: Research Square preprint supplement (doi:10.21203/rs.3.rs-8098038/v1), 2025-11-28
Supplement: Supplementary file 1 [file f08b2a12ee7c0339c779e5b9.docx]

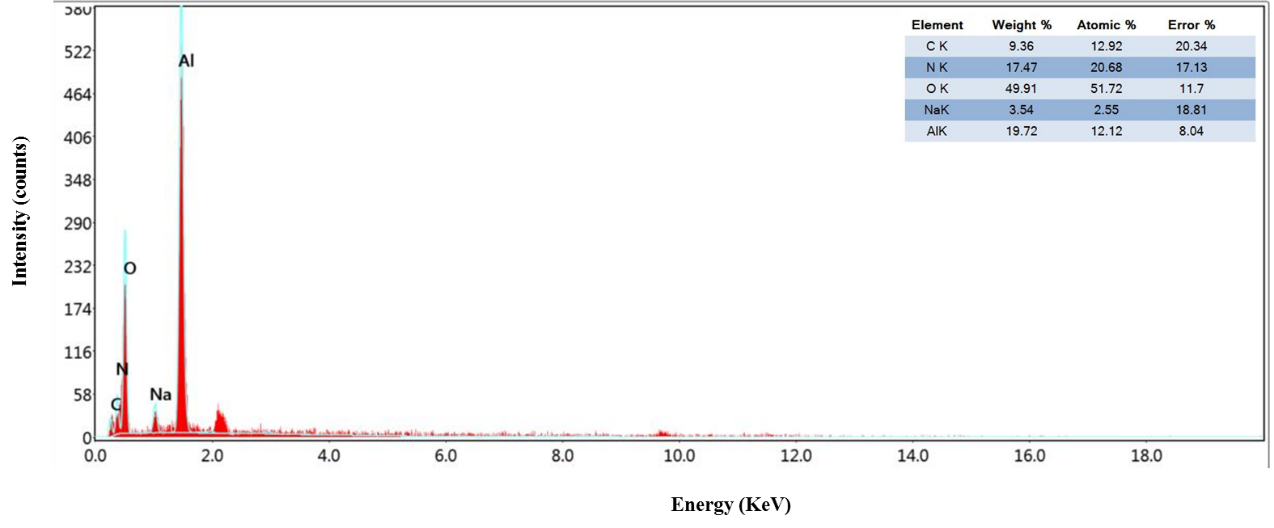


**Fig. S1**. Energy-dispersive X-ray (EDX) spectrum of AO@Cs, confirming the elemental composition of the synthesized material.


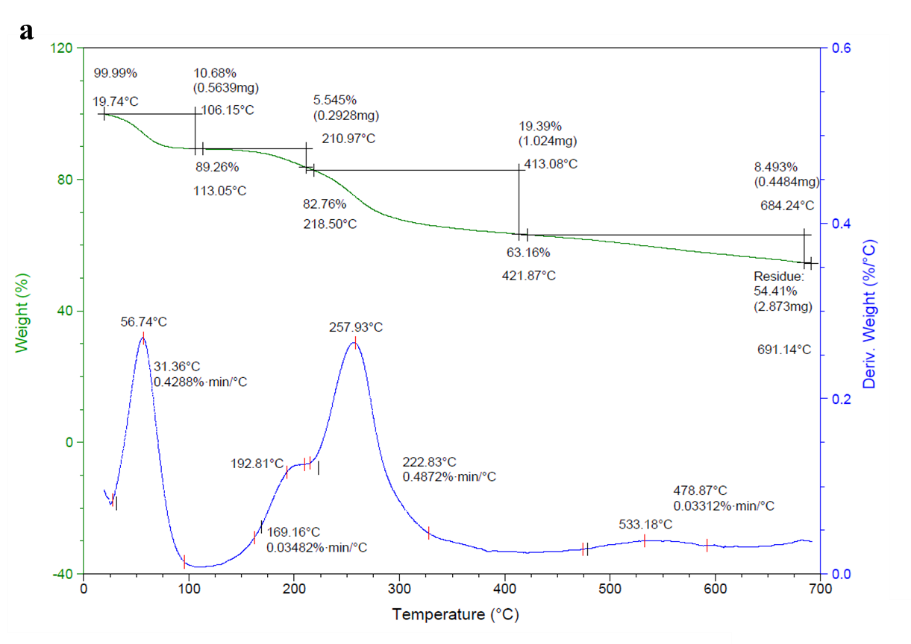


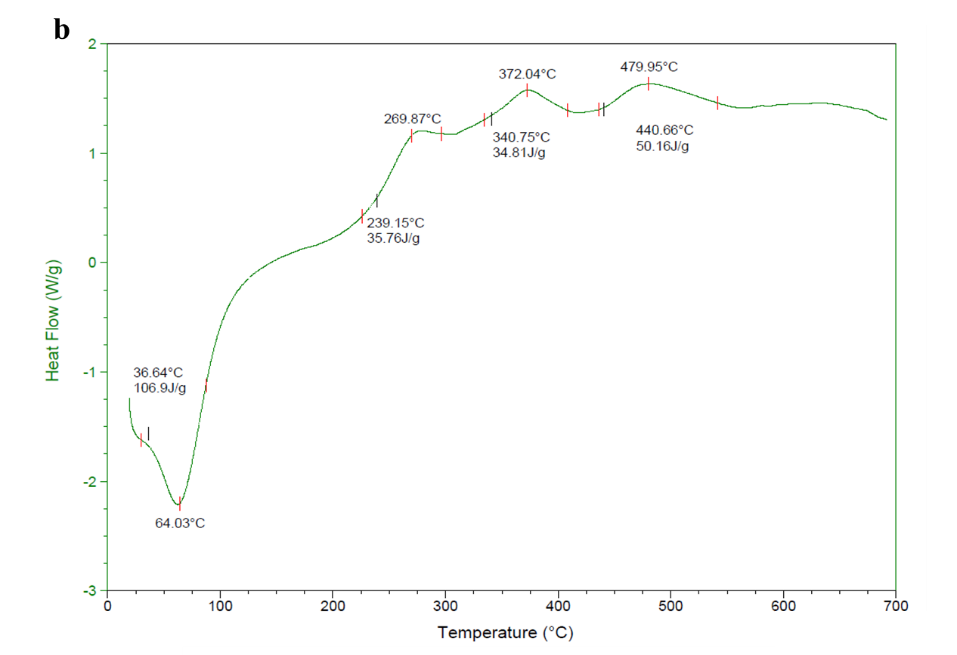


**Fig. S2**. (a) TGA and (b) DSC curves of α-AO@CS, showing the thermal stability, weight loss behavior, and characteristic transitions of the composite.

Fig.S3. Pseudo-first order (PFO) kinetic model for humic acid adsorption onto Al₂O₃, chitosan, and α-AO@CS composite. The PFO model shows poor correlation with experimental data, with calculated qe​ values deviating significantly from experimental ones. This indicates that the PFO model is not suitable to describe the adsorption kinetics of humic acid.

Table: S1. Effect of key operational parameters pH, adsorbent dosage, contact time, initial humic acid concentration (C₀), and temperature on the removal efficiency (%R) of humic acid using Al₂O₃, chitosan, and the α-AO@CS composite.

| **Parameters** | | **Al2O3** | **Chitosan** | **α-AO@CS** |
| --- | --- | --- | --- | --- |
| **pH** | 3 | 89.68 | 22.26 | 42.10 |
| 5 | 80.97 | 16.59 | 47.16 |
| 7 | 49.19 | 74.90 | 91.70 |
| 9 | 23.47 | 46.55 | 89.47 |
| 11 | 19.22 | 42.50 | 58.30 |
| **Dosage (g)** | 0.05 | 67.81 | 41.69 | 67.00 |
| 0.1 | 79.76 | 82.83 | 77.12 |
| 0.2 | 88.66 | 80.65 | 96.36 |
| 0.4 | 89.68 | 69.23 | 90.08 |
| 0.6 | 90.89 | 49.79 | 96.15 |
| 0.8 | 88.26 | 32.79 | 95.34 |
| 1 | 89.68 | 50.60 | 95.95 |
| **Avg.** | 84.96 | 58.23 | 88.29 |
| **Min.** | 67.81 | 32.79 | 67.00 |
| **Max.** | 90.89 | 82.83 | 96.36 |
| **Time** | 10 | 81.78 | 65.99 | 90.28 |
| 30 | 86.84 | 72.47 | 89.47 |
| 60 | 85.83 | 78.14 | 91.09 |
| 90 | 86.33 | 78.14 | 88.66 |
| 120 | 88.36 | 78.95 | 87.85 |
| 160 | 87.85 | 75.71 | 86.23 |
| 180 | 89.88 | 66.80 | 82.18 |
| **Avg.** | 86.70 | 73.74 | 87.97 |
| **Min.** | 81.78 | 65.99 | 82.18 |
| **Max.** | 89.88 | 78.95 | 91.09 |
| **Conc (C0)** | 5 | 90.04 | 85.42 | 96.98 |
| 10 | 89.61 | 80.04 | 96.44 |
| 20 | 88.56 | 73.46 | 94.52 |
| 40 | 91.19 | 73.32 | 82.98 |
| 60 | 91.56 | 66.53 | 73.76 |
| 80 | 93.94 | 37.41 | 68.38 |
| 100 | 92.49 | 39.75 | 64.49 |
| **Avg.** | 91.06 | 65.13 | 82.51 |
| **Min.** | 88.56 | 37.41 | 64.49 |
| **Max.** | 93.94 | 85.42 | 96.98 |
| **Temperature (oc)** | 25 | 71.66 | 90.28 | 95.95 |
| 35 | 73.68 | 91.90 | 96.76 |
| 45 | 75.71 | 92.71 | 97.57 |
| 55 | 77.73 | 94.33 | 97.57 |
| 65 | 79.76 | 95.14 | 98.38 |
| **Avg.** | 75.71 | 92.87 | 97.25 |
| **Min.** | 71.66 | 90.28 | 95.95 |
| **Max.** | 79.76 | 95.14 | 98.38 |
